# Supplementary material for: Osteomatrix as a personalized 3D tissue-specific invasion test-bed for oral carcinoma
Source: Royal Society of Chemistry journal article supplement (doi:10.1039/d2bm01870e), 2023-01-01
Supplement: d2bm01870e1.pdf [file d2bm01870e1.pdf]

## Supplementary Information

### **Osteomatrix as a personalized 3D tissue-specific invasion test-bed for oral carcinoma**

Sukanya V.S <sup>a</sup>, Pravin Shankar Giri <sup>a</sup>, Vijaykumar Nellore <sup>b</sup>, Subha Narayan Rath <sup>a\*</sup>

<sup>a</sup>. Regenerative Medicine and Stem cell Laboratory (RMS), Department of Biomedical Engineering, Indian Institute of Technology Hyderabad (IITH), Sangareddy 502285, Telangana, India.

<sup>b</sup>. V R clinic, Secunderabad 500056, Telangana, India.

Corresponding author E-mail: [subharath@bme.iith.ac.in](mailto:subharath@bme.iith.ac.in)

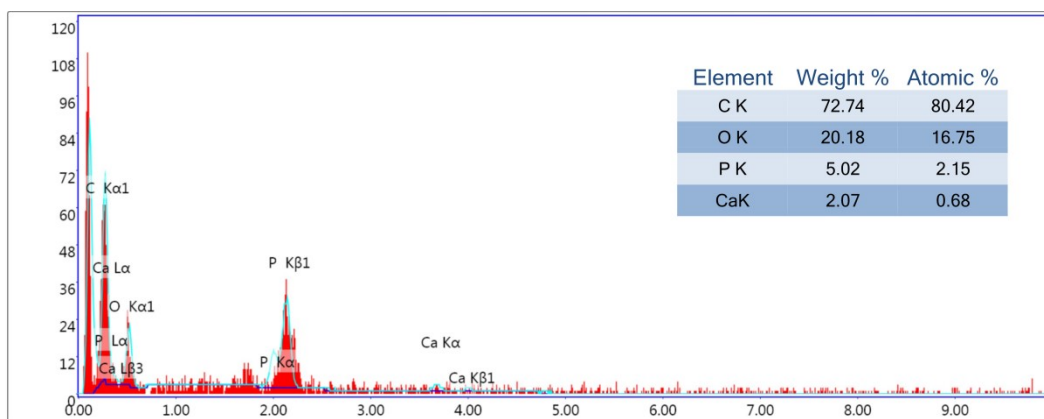

**Figure S1** Elemental analysis of osteomatrix from energy dispersive X-ray spectroscopy.

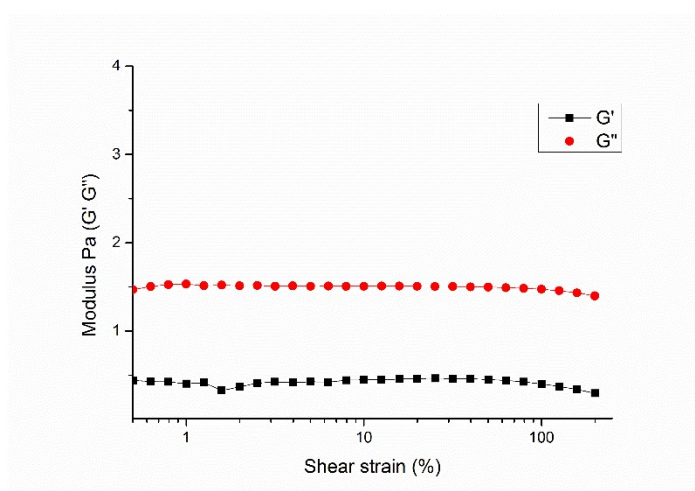

**Figure S2** Amplitude sweep of osteomatrix (1%) subjected to 0.01–100% strain at a constant angular frequency. Data represent mean  $\pm$  standard deviation for  $n = 4$ .

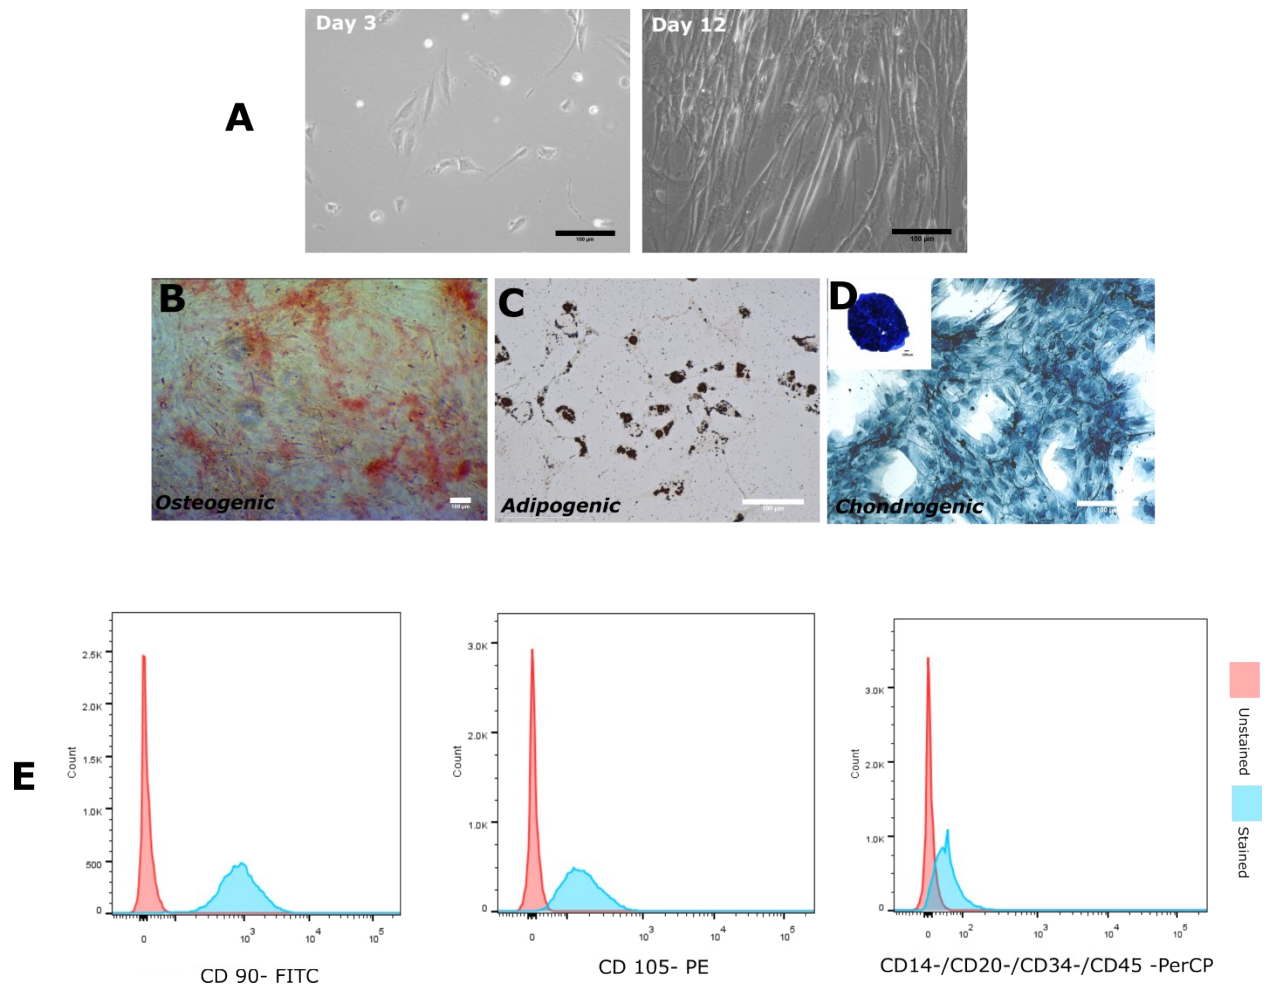

**Figure S3** Characterization of isolated human adipose-derived stem cells (ADSCs) (A) ADSCs in culture showed adherent, spindle-shaped fibroblast-like cells. Trilineage differentiation potential confirmed by staining (B) Alizarin red (C) Oil red O and (D) Alcian blue. (E) Flow cytometric analysis of surface markers as recommended by the International Society for Cellular Therapy (ISCT). Representative graphs of a population with most of the cells positive for CD90 and CD73 and negative for CD 14, CD 20, CD34 and CD 45. Scale: 100  $\mu$ m.

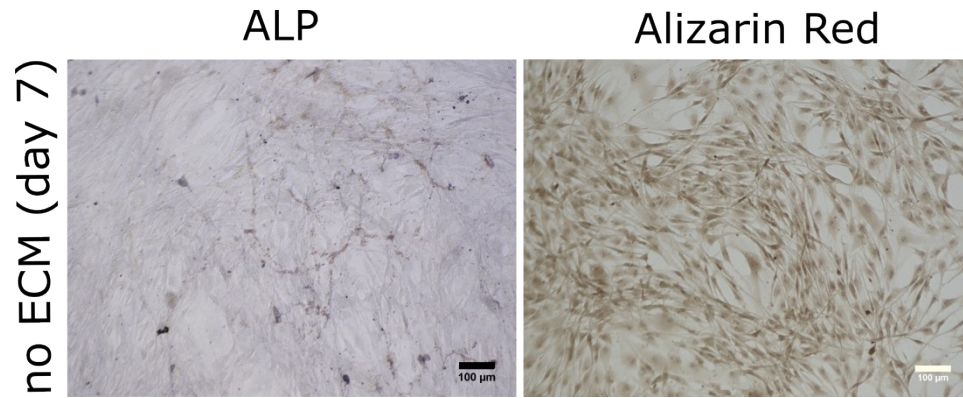

**Figure S4** Representative images of ALP and Alizarin Red staining of ADSCs cultured on non-coated control (no ECM) for day 7. Scale: 100 µm.

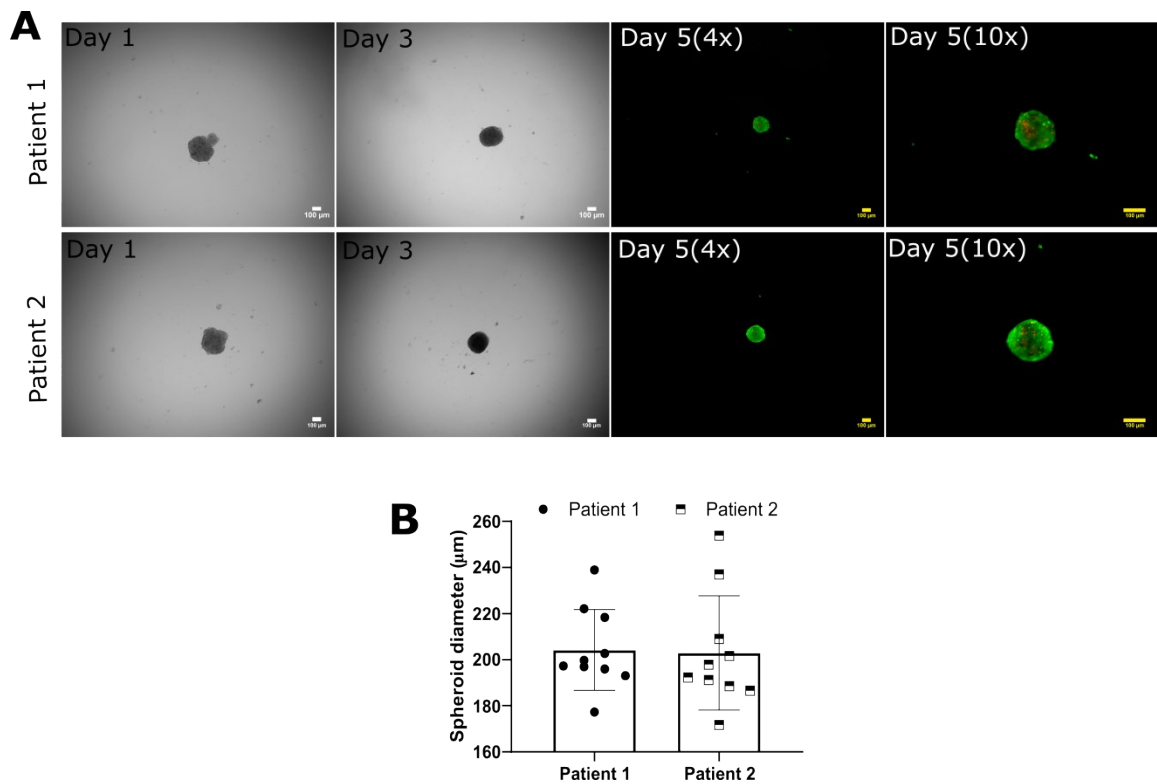

**Figure S5** Formation and growth of CSC-enriched spheroid in culture. (A) Image analysis of spheroids from patients over time (5 days) .Green channel: Calcein-AM, Red channel: PI. Scale: 100 µm. (B) Spheroid size distribution obtained from measuring spheroid diameter using ImageJ. Average diameter of spheroids is  $200 \pm 10.59$  µm. Error bar represents spheroids of random spheroids of 96-well plate.

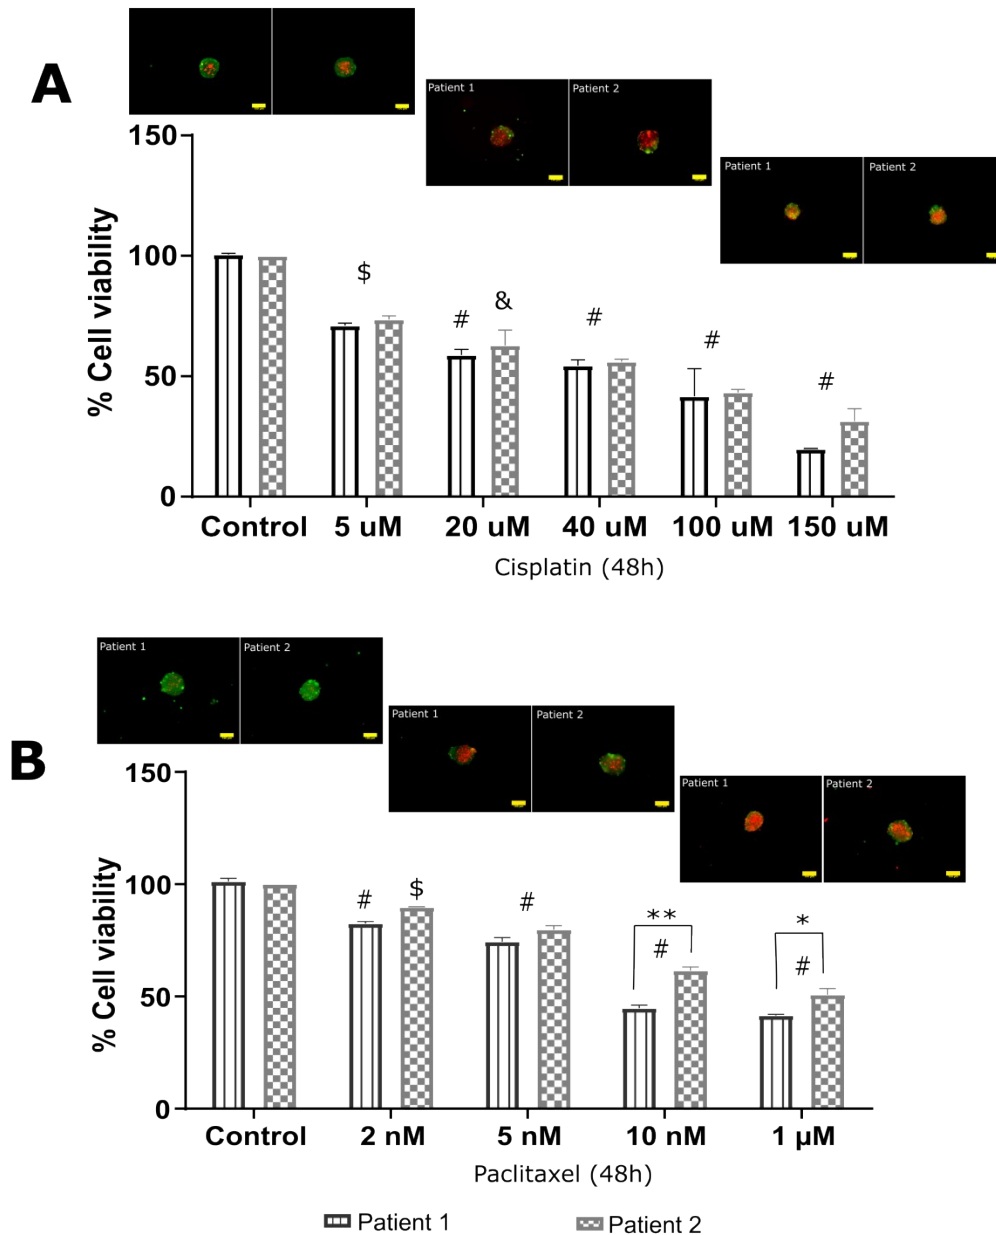

**Figure S6** Cell viability of spheroids in suspension culture. Image-based quantification of cell viability and corresponding representative live/dead fluorescence micrographs of drug treated (48h) spheroids in suspension (A) Cisplatin treatment at doses ranging from 5  $\mu$ M to 150  $\mu$ M. (B) Paclitaxel treatment at doses ranging from 2 nM to 1  $\mu$ M. Green channel: Calcein-AM, Red channel: PI. All data normalized to control. Data represent mean  $\pm$  standard deviation for  $n = 6$ . \* $p < 0.05$ , \*\* $p < 0.01$ , \*\*\* $p < 0.001$ . '\$' shows  $p < 0.05$ , '&' shows  $p < 0.01$ , and '#' shows  $p < 0.001$  with control. Scale: 100  $\mu$ m.

**Table S1.** List of Primers for RT-qPCR Analysis

| Gene         | Forward primer       | Reverse primer         |
|--------------|----------------------|------------------------|
| <b>GAPDH</b> | CTCTCTGCTCCTCCTGTTCG | TTTCTCTCCGCCCCTCTTC    |
| <b>COL1</b>  | AAATGGAGCTCCTGGTCAGA | GTAGCACCATCATTTCCACGA  |
| <b>RUNX2</b> | TTGCCTTCAAACCCTAACGG | GAGTCAGGATGAATTCCAAGGG |
| <b>OPN</b>   | TGAAACTGTGCCAGCCAAAC | AGTCTAATTGCAGTGACCCCC  |

**Table S2.** Clinical and pathological findings of patients in the study

| Patient   | Sex    | TNM staging | Diagnosis                                         | Invasion                 |
|-----------|--------|-------------|---------------------------------------------------|--------------------------|
| Patient 1 | Female | T3N1M0      | Well differentiated squamous cell carcinoma       | Exfoliative growth       |
| Patient 2 | Female | T3N1M0      | Moderately differentiated squamous cell carcinoma | Alveolar gingival growth |

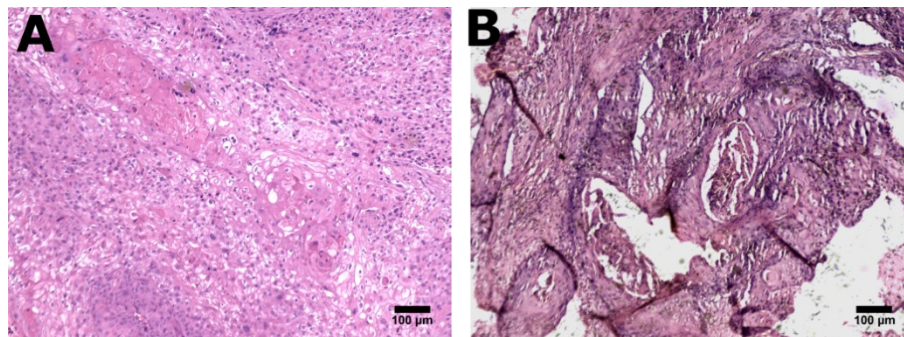

**Figure S7** H & E stained section of (A) Patient 1 (B) Patient 2. Scale bar: 100 µm.
